# Supplementary material
Source: publisher figshare collection journal article supplement (https://gsapubs.figshare.com/ndownloader/files/38882955)
Supplement: Supplementary file 1 [file 38882955]

## Sheet: Sheet1
Lake Stage	Sample Depth (m)	Sample Depth (ft)	Primary Grain Size/Lithology	Secondary Grain Size/Lithology	Interpolated Age (ka)	Age Error (±2σ)	Extended Age (ka)	Error (±2σ)	Averaged Age (ka)	Error (±2σ)	% Carbonate	δ13Ocarb (‰)	δ18Ocarb (‰)	δ18Ocarb (‰) Running 1σ	Stable Isotope Instrument (Brown 252, Brown 253+ or Stanford Deltaplus XL)	Stable Isotope Replicates	Lithium (ppm)	SiO2 (%)	Al2O3 (%)	Fe2O3 (%)	MgO (%)	CaO (%)	Na2O (%)	K2O (%)	TiO2 (%)	P2O5 (%)	MnO (%)	Cr2O3 (%)	V2O5 (%)	LOI (%)	Sum (%)	SiO2/Al2O3	Lithium and Whole Rock Measurement Reference	Degree of Weathering (CIA) corrected for % Carbonate	CIA corrected for halite based on Coffey et al. (2021) XRD results
dessicated	5.14502	16.88	gravel	sand	22.5112	9.70921	N/A	N/A	N/A	N/A	8	0.852	-7.081		Brown 253+	1	270	61.1	12.2	2.88	2.03	6.23	2.54	3.67	0.43	0.1	0.07	< 0.01	0.01	7.96	99.2	8.49935	this study	52.3842	no
dessicated	8.2296	27	sand	gravel	32.9719	9.54652	N/A	N/A	N/A	N/A	6.9	-0.679	-10.48		Brown 253+	1
dessicated	9.04342	29.67	sand	gravel	35.7229	9.50412	N/A	N/A	N/A	N/A	7.8	-1.184	-12.837	2.42306	Brown 253+	1	120	62.3	12.2	3.78	1.95	5.81	1.48	3.05	0.76	0.13	0.05	< 0.01	< 0.01	7.75	99.2	8.67	this study	60.3	no
shallow	9.65302	31.67	sand	N/A	37.7946	9.47231	N/A	N/A	N/A	N/A	9.7	-0.561	-12.333	1.04468	Brown 253+	1
shallow	10.2748	33.71	sand	N/A	39.9003	9.44007	N/A	N/A	N/A	N/A	5	-0.325	-12.648	1.01185	Brown 253+	1
shallow	11.7348	38.5	sand	N/A	44.8589	9.36455	N/A	N/A	N/A	N/A	4.7	-0.43	-11.049	2.05924	Brown 252	1	100	62.7	12	3.09	1.79	5.98	2.25	3.63	0.44	0.09	0.06	< 0.01	< 0.01	7.84	99.9	8.87	this study	61.13	no
shallow	11.9116	39.08	sand	N/A	45.4703	9.35527	N/A	N/A	N/A	N/A	8.2	-0.036	-10.577	2.11895	Brown 253+	1
shallow	14.9047	48.9	sand	clay	55.6252	9.20255	N/A	N/A	N/A	N/A	7.9	2.377	-7.47	2.29441	Brown 252	1	260	60.2	12.4	2.6	1.66	6.76	2.35	4.09	0.43	0.09	0.07	< 0.01	< 0.01	9.36	100	8.24	this study	59.92	no
shallow	15.301	50.2	sand	clay	56.9838	9.18231	N/A	N/A	N/A	N/A	9.5	2.49	-8.239	1.82738	Brown 252	1
shallow	17.8918	58.7	clay	N/A	65.7802	9.05235	N/A	N/A	N/A	N/A	10.1	3.905	-5.475	1.57355	Brown 252	1	300	56	11.7	3.01	2.8	8.42	2.25	3.68	0.44	0.13	0.09	< 0.01	< 0.01	10.9	99.5	8.12	this study	60.36	no
shallow	20.7874	68.2	clay	N/A	75.6295	8.90919	N/A	N/A	N/A	N/A	8.7	0.671	-8.121	2.61533	Brown 252	1
shallow	23.6525	77.6	clay	silt	85.3429	8.77056	N/A	N/A	N/A	N/A	14	0.203	-9.832	2.80084	Brown 252	1	290	44.4	14.9	5.39	4.47	9.46	0.85	4.12	0.61	0.13	0.11	< 0.01	< 0.01	15.2	99.6	5.06	this study	71.78	no
shallow	24.8717	81.6	clay	silt	89.4864	8.71223	N/A	N/A	N/A	N/A	7.2	-0.017	-12.607	2.47128	Brown 252	1	120	59.9	12.2	3.02	2.57	6.46	2.08	3.79	0.44	0.1	0.06	< 0.01	0.01	8.9	99.5	8.33	this study	51.1	no
shallow	25.7251	84.4	clay	silt	92.4073	8.67141	N/A	N/A	N/A	N/A	15.1	-0.257	-6.64	2.32556	Brown 252	1
shallow	27.6149	90.6	clay	silt	98.7923	8.58303	N/A	N/A	N/A	N/A	6.5	-0.465	-11.726	2.41656	Brown 252	1	190	57.1	13.4	4.17	2.75	6.85	2	3.54	0.7	0.16	0.07	< 0.01	0.01	9	99.7	7.23	this study	51.6	no
shallow	28.133	92.3	clay	silt	100.558	8.55881	N/A	N/A	N/A	N/A	6.1	0.056	-11.121	2.03802	Brown 252	1	90	60.5	12.5	2.69	2.24	6.21	2.48	3.82	0.43	0.12	0.06	< 0.01	< 0.01	8.31	99.3	8.21	this study	49	no
shallow	30.2362	99.2	ash	pumice	107.725	8.46148	N/A	N/A	N/A	N/A	7.7	0.779	-8.903	1.78671	Brown 252	1
y6	30.77	100.951	ash	pumice	109.525	8.43728	N/A	N/A	N/A	N/A							50	48	10.5	1.62	0.93	16.3	3.28	3.65	0.33	0.08	0.12	0.01	< 0.01	15.7	100.5	7.76	Coffey et al., 2021	55	yes
shallow	31.3944	103	sand	silt	111.63	8.4091	N/A	N/A	N/A	N/A	11.6	0	-10.4	1.81562	Brown 252, Stanford Deltaplus XL	2
shallow	32.004	105	silt	clay	113.702	8.38152	N/A	N/A	N/A	N/A	5	-0.915	-13.762	1.83937	Brown 252	1	80	63	13.5	3.46	2.09	5.5	2.66	3.27	0.58	0.17	0.06	< 0.01	0.02	5.46	99.8	7.92	this study	63.04	no
shallow	33.8328	111	silt	clay	119.917	8.29961	N/A	N/A	N/A	N/A	11.1	-1.447	-10.054	2.19044	Brown 252	1
shallow	36.0274	118.2	sand	gravel	127.389	8.20284	N/A	N/A	N/A	N/A	4.2	-1.137	-11.516	2.1841	Brown 252	1
shallow	47.5793	156.1	clay	N/A	166.617	7.728	N/A	N/A	N/A	N/A	8.5	1.449	-7.756	1.47681	Brown 252	1
shallow	48.8442	160.25	clay	N/A	170.896	7.67984	N/A	N/A	N/A	N/A	19.6219	-0.536	-10.782	1.50736	Brown 252	1	280	50.5	17.4	6.12	2.85	4.39	1.91	4.83	0.7	0.12	0.07	0.01	0.01	10.6	99.6	4.93	Coffey et al., 2021	69.3	yes
shallow	48.9814	160.7	clay	N/A	171.371	7.67454	N/A	N/A	N/A	N/A	7.7	-0.659	-11.017	1.80787	Brown 252	1
shallow	51.877	170.2	silt	clay	181.221	7.56685	N/A	N/A	N/A	N/A	11.5	0.432	-9.562	1.09766	Brown 252	1	430	50.7	12.5	4.2	3.17	8.41	2.3	4.01	0.63	0.14	0.09	0.01	< 0.01	14.1	100.3	6.88	this study	60.6	no
shallow	58.3997	191.6	sand	N/A	203.365	7.34056	N/A	N/A	N/A	N/A	7.7	0.144	-12.612	1.14443	Brown 252	1
shallow	63.8556	209.5	sand	silt	221.908	7.16911	N/A	N/A	N/A	N/A	8.6	0.049	-10.633	1.26987	Brown 252	1
shallow	65.8978	216.2	silt	sand	228.837	7.10954	N/A	N/A	N/A	N/A	6.1	-0.488	-11.701	1.57887	Brown 252	1	180	53.4	12.9	4.72	2.97	7.04	2.71	3.03	0.66	0.14	0.05	0.01	0.01	12.3	100	7.03	this study	62.51	no
shallow	68.35	224.245	clay	N/A	237.158	7.04136	N/A	N/A	N/A	N/A	48.3514	-2.698	-9.892	1.58194	Brown 252	1	370	49.8	13	4.25	2.7	7.25	3.64	4.34	0.57	0.11	0.08	0.01	< 0.01	14.6	100.4	6.5	Coffey et al., 2021	53.7	yes
shallow	69.7687	228.9	silt	N/A	241.981	7.00357	N/A	N/A	N/A	N/A	9.4	0.033	-8.544	1.56063	Brown 252	1	410	47.7	10.8	5.03	3.65	9.15	4.45	3.49	0.43	0.12	0.12	0.03	< 0.01	16.1	101.1	7.5	this study	49.32	no
shallow	73.152	240	silt	sand	253.46	6.91883	N/A	N/A	N/A	N/A	11	1.07	-7.76	0.774706	Brown 252	1	340	52.4	11.8	3.29	1.73	7.3	5.59	3.78	0.54	0.15	0.07	< 0.01	0.02	14.6	101.2	7.54	this study	44	no
Deep lake	75.5904	248	clay	silt	261.747	6.86234	N/A	N/A	N/A	N/A	9	0.656	-8.473	1.00597	Brown 252	1
Deep lake	78.2726	256.8	clay	silt	270.849	6.80496	N/A	N/A	N/A	N/A	8.8	0.766	-8.851	1.54322	Brown 252	1
Deep lake	79.5833	261.1	clay	N/A	275.298	6.77872	N/A	N/A	N/A	N/A	7.4	0.978	-6.34	1.58445	Brown 252	1
Deep lake	84.2162	276.3	clay	silt	291.057	6.6956	N/A	N/A	N/A	N/A	13.7	1.088	-5.152	1.96681	Brown 252	1	570	36.5	8.93	4.18	3.78	15.6	4.19	3.32	0.36	0.13	0.15	0.01	0.01	23.2	100.4	6.94	this study	45.99	no
Deep lake	86.0146	282.2	clay	silt	297.137	6.66771	N/A	N/A	N/A	N/A	10.1	-1.756	-8.175	1.92833	Brown 252	1
Deep lake	89.7026	294.3	clay	silt	309.669	6.61773	N/A	N/A	N/A	N/A	7.1	0.061	-10.063	2.54071	Brown 252	1
Deep lake	94.3661	309.6	clay	silt	325.53	6.56927	N/A	N/A	N/A	N/A	13.1	-0.832	-6.306	1.88948	Brown 252	1	530	45.4	13.3	4.97	3.11	8.07	3.79	4.64	0.56	0.23	0.12	< 0.01	0.01	15.7	99.9	5.79	this study	52.5	no
Deep lake	97.0178	318.3	clay	silt	334.53	6.54925	N/A	N/A	N/A	N/A	10.9	0.166	-11.277	1.95846	Brown 252	1
Deep lake	97.5665	320.1	clay	silt	336.398	6.54578	N/A	N/A	N/A	N/A	10.4	-0.456	-8.689	3.29185	Brown 252	1	380	50.2	12.6	4.33	2.72	7.4	3.99	4.17	0.52	0.17	0.11	0.01	0.02	14.5	100.7	6.76	this study	53.21	no
Deep lake	103.693	340.2	silt	clay	357.183	6.52322	N/A	N/A	N/A	N/A	6.4	0.065	-7.617	3.35608	Brown 252	1
Deep lake	106.68	350	clay	N/A	367.338	6.52295	N/A	N/A	N/A	N/A	10.1	1.719	-2.349	2.88285	Brown 252	1	670	22.1	5.8	4.98	3.36	23.7	4.32	2.43	0.21	0.12	0.12	< 0.01	0.01	29.7	96.9	6.47	this study	37.33	no
Deep lake	107.975	354.25	clay	N/A	371.754	6.52503	N/A	N/A	N/A	N/A	21.5618	0.801	-5.606	3.18149	Brown 252	1	810	41.6	12.2	4.27	3.78	8.34	4.78	5.17	0.47	0.15	0.09	< 0.01	0.01	19.7	100.6	5.79	Coffey et al., 2021	54.2	yes
Deep lake	109.728	360	clay	silt	377.697	6.52995	N/A	N/A	N/A	N/A	8.4	0.713	-9.59	3.19499	Brown 252	1
Deep lake	116.373	381.8	clay	silt	400.249	6.57046	N/A	N/A	N/A	N/A	10.4	0.38	-10.14	1.83786	Brown 252	2	210	52.2	13.1	4.09	2.99	7.97	3.14	3.61	0.56	0.16	0.06	0.06	< 0.01	11.8	99.7	6.76	this study	51	no
Deep lake	127.889	419.583	silt	clay	439.374	6.72091	N/A	N/A	N/A	N/A	11	0.550699	-7.87828	1.2157	Brown 252, Stanford Deltaplus XL	2
Deep lake	128.016	420	silt	clay	439.816	6.72317	N/A	N/A	N/A	N/A	10.8	-2.721	-7.162	1.43411	Brown 252	1
Deep lake	130.073	426.75	silt	clay	446.778	6.76041	N/A	N/A	N/A	N/A	10.6	-0.0167413	-8.64406	0.842544	Stanford Deltaplus XL	1
Deep lake	133.99	439.6	clay	silt	460.092	6.83988	N/A	N/A	N/A	N/A	10.2	2.871	-6.414	0.808931	Brown 252	1	440	54	11.8	2.63	2.25	8.31	4.2	3.78	0.48	0.13	0.06	< 0.01	0.01	12.5	100.1	7.77	this study	43.4	no
Deep lake	136.703	448.5	clay	silt	469.296	6.90099	N/A	N/A	N/A	N/A	12	1.198	-7.18	0.848982	Brown 252	1
Deep lake	137.373	450.7	clay	silt	471.571	6.91687	N/A	N/A	N/A	N/A	12.8	0.546	-7.269	0.559661	Brown 252	1	380	45.5	12.1	3.89	3.24	10	3.84	3.95	0.56	0.13	0.11	< 0.01	< 0.01	17.6	101	6.38	this study	44	no
Deep lake	140.056	459.5	clay	silt	480.707	6.98356	N/A	N/A	N/A	N/A	8	0.763	-7.986	0.505836	Brown 252	1
Deep lake	140.909	462.3	silt	clay	483.594	7.00562	N/A	N/A	N/A	N/A	11.9	-0.219	-7.211	0.53421	Brown 252	1	580	48.5	11.5	3.36	3.25	8.28	4.57	4.25	0.45	0.13	0.1	< 0.01	< 0.01	16.6	101	7.16	this study	43.8	no
Deep lake	142.921	468.9	clay	silt	490.421	7.05959	N/A	N/A	N/A	N/A	11.7	-0.451	-8.259	1.00721	Brown 252	1	470	48.6	13.1	4.49	3.14	6.88	4.09	4.38	0.53	0.15	0.08	< 0.01	0.01	15.3	100.7	6.3	this study	53.32	no
Deep lake	142.723	468.25	clay	silt	489.741	7.0541	N/A	N/A	N/A	N/A	30.0896	-0.012	-7.054	1.01738	Brown 252	1	640	46.2	12.6	4.32	3.48	6.65	4.18	5.21	0.5	0.14	0.11	< 0.01	0.02	16.9	100.2	6.22	Coffey et al., 2021	59.9	yes
Deep lake	145.786	478.3	silt	N/A	500.168	7.141	N/A	N/A	N/A	N/A	8.8	0.323	-9.574	0.967404	Brown 252	1
Deep lake	147.767	484.8	clay	silt	506.893	7.20007	N/A	N/A	N/A	N/A	10.7	0.119	-7.696	1.73109	Brown 252	1	580	46	13.6	4.49	3.1	6.64	4.27	5.26	0.52	0.12	0.05	< 0.01	0.02	15.9	99.9	5.74	this study	50	no
Deep lake	149.565	490.7	clay	silt	513.006	7.25577	N/A	N/A	N/A	N/A	10.5	-0.314	-8.756	1.85013	Brown 252	1
Deep lake	151.729	497.8	clay	silt	520.342	7.32507	N/A	N/A	N/A	N/A	10.5	-1.178	-11.4825	1.80303	Brown 252	2	390	49.8	11.4	3.62	3.68	9.34	3.29	3.26	0.58	0.13	0.06	0.02	0.01	15.2	100.5	7.41	this study	43.3	no
Deep lake	154.67	507.448	clay	N/A	530.327	7.42356	N/A	N/A	N/A	N/A	24.5753	-1.808	-6.628	1.72422	Brown 252	1	680	41.7	10.7	3.64	3.53	11	4.07	4.5	0.43	0.14	0.16	0.01	0.01	19.4	99.3	6.61	Coffey et al., 2021	42	yes
Deep lake	155.326	509.6	clay	N/A	532.569	7.44631	N/A	N/A	N/A	N/A	13	-2.308	-8.648	1.7356	Brown 252	1
Deep lake	156.301	512.8	clay	silt	535.863	7.48017	N/A	N/A	N/A	N/A	5.3	0.729	-8.931	1.34999	Brown 252	1
Deep lake	158.984	521.6	clay	N/A	544.965	7.57626	N/A	N/A	N/A	N/A	10.6	0.047	-8.451	1.7635	Brown 252	1	610	48	13.4	4.58	3.19	6.21	4.3	4.96	0.56	0.13	0.05	< 0.01	0.01	14.4	99.8	6.08	this study	51.5	no
Deep lake	161.818	530.9	clay	silt	554.611	7.68205	N/A	N/A	N/A	N/A	10	-2.034	-5.921	2.11285	Brown 252	1
Deep lake	163.098	535.1	clay	silt	558.958	7.73101	N/A	N/A	N/A	N/A	11.8	-1.099	-5.109	2.00243	Brown 252	1	450	18.4	4.64	1.87	2.15	22.1	2.21	1.7	0.19	0.08	0.08	< 0.01	< 0.01	20.6	74	6.73	this study	12.2	no
Deep lake	164.622	540.1	silt	clay	564.12	7.79016	N/A	N/A	N/A	N/A	9.8	-2.432	-10.126	1.96013	Brown 252	1
Deep lake	166.451	546.1	clay	silt	570.336	7.8628	N/A	N/A	N/A	N/A	7.7	0.005	-7.646	1.84212	Brown 252	1	250	53.3	11.2	3	1.84	6.81	4.12	3.53	0.46	0.14	0.09	< 0.01	< 0.01	13.1	97.6	8.08	this study	51.38	no
Deep lake	170.871	560.6	clay	silt	585.347	8.04439	N/A	N/A	N/A	N/A	10.4	0.301	-8.045	1.54931	Brown 252	1
Deep lake	173.34	568.7	clay	silt	593.736	8.14949	N/A	N/A	N/A	N/A	8.8	0.98	-8.763	1.20552	Brown 252	1	340	55.4	12.7	3.04	2.31	6.15	3.72	4.34	0.48	0.13	0.07	< 0.01	0.01	11.2	99.5	7.4	this study	50	no
Deep lake	175.23	574.9	silt	clay	600.155	8.23159	N/A	N/A	N/A	N/A	14.5	-1.259	-5.898	1.2004	Brown 252	1
Deep lake	176.936	580.5	silt	clay	605.963	8.30708	N/A	N/A	N/A	N/A	10.4	-0.467	-8.901	1.53258	Brown 252	1	240	56.2	11.4	2.37	1.91	7.82	4.01	3.76	0.39	0.11	0.05	< 0.01	< 0.01	12.2	100.2	8.37	this study	44.8	no
Deep lake	179.71	589.6	silt	clay	615.371	8.43173	N/A	N/A	N/A	N/A	11.6	-2.08	-7.948	1.37851	Brown 252	1
Deep lake	183.185	601	clay	silt	627.156	8.59182	N/A	N/A	N/A	N/A	12.8	-1.961	-5.741	1.84521	Stanford Deltaplus XL	1
Deep lake	184.785	606.25	ash	N/A	632.699	8.55989	N/A	N/A	N/A	N/A							180	68.1	10.9	1.57	0.14	0.61	5.84	5.28	0.11	< 0.01	0.02	< 0.01	< 0.01	7.41	100	n/a	Coffey et al., 2021	n/a	n/a
Deep lake	186.294	611.2	clay	silt	638.083	8.22269	N/A	N/A	N/A	N/A	14.4	0.015	-6.457	1.41911	Brown 252	1	630	44.4	10	3.74	3.15	10.7	3.75	3.61	0.43	0.13	0.13	< 0.01	0.01	17.9	98	7.54	this study	49.81
Deep lake	187.833	616.25	clay	silt	643.61	7.88727	N/A	N/A	N/A	N/A	42.3777	1.954	-4.2	1.30751	Brown 252	1	960	33.3	6.78	2.43	5.85	16.4	4.64	2.74	0.25	0.09	0.08	< 0.01	0.01	27.3	99.9	8.34	Coffey et al., 2021	54.5	yes
Deep lake	190.043	623.5	clay	silt	651.542	7.42788	N/A	N/A	N/A	N/A	8	1.558	-5.112	3.13726	Brown 252	1	330	54.2	12	3.04	2.33	7.35	3.97	3.8	0.51	0.12	0.09	< 0.01	< 0.01	12.9	100.4	7.67	this study	43.5	no
Deep lake	195.194	640.4	clay	silt	670.026	6.48598	N/A	N/A	N/A	N/A	11.6	2.373	-3.124	3.21347	Brown 252	1
Deep lake	200.833	658.9	clay	silt	690.269	5.74427	N/A	N/A	N/A	N/A	11.9	-1.281	-11.177	3.39414	Brown 252	1
Deep lake	203.576	667.9	silt	clay	700.139	5.52955	N/A	N/A	N/A	N/A	12.7	-2.634	-4.248	3.65793	Brown 252	1	240	46.6	9.58	2.34	1.47	9.41	3.96	3.16	0.25	0.09	0.08	< 0.01	< 0.01	12.9	89.8	8.26	this study	40.8	no
Deep lake	206.731	678.25	clay	silt	711.445	5.42364	N/A	N/A	N/A	N/A	10.5	-1.42964	-8.90161	3.37279	Brown 252, Stanford Deltaplus XL	2
Deep lake	207.721	681.5	clay	silt	714.998	5.42282	N/A	N/A	N/A	N/A	4.5	-1.106	-10.384	3.39574	Brown 252	1	190	59.3	13.1	3.79	1.77	4.67	3.16	4.09	0.51	0.11	0.06	< 0.01	0.01	9.09	99.7	7.68	this study	57.64	no
Deep lake	210.282	689.9	clay	silt	724.186	5.49296	N/A	N/A	N/A	N/A	4.4	-7.97363	-4.1145	3.44657	Brown 252	1	550	16.4	3.87	2.09	2.86	23	2.2	1.75	0.11	0.14	0.3	< 0.01	< 0.01	23.9	76.5	7.19	this study	41.24	no
Deep lake	214.732	704.5	clay	silt	740.158	5.84899	N/A	N/A	N/A	N/A	9.1	1.439	-2.549	3.86384	Brown 252	1	970	35.1	6.78	2.6	3.92	15.1	3.55	2.51	0.17	0.06	0.1	< 0.01	< 0.01	20.5	90.4	8.79	this study	44.21	no
Deep lake	222.58	730.249	ash	pumice	768.385	6.97821	N/A	N/A	N/A	N/A							80	71.6	12	1.14	0.24	1.29	3.39	5.12	0.1	0.02	0.02	0.03	< 0.01	4.03	99	10.13	Coffey et al., 2021	51.3	yes
Deep lake	233.553	766.25	clay	N/A	810.276	11.2931	N/A	N/A	N/A	N/A	27.8256	2.212	-3.893	3.30504	Brown 252	1	1700	42	8.98	3.09	6.01	12.1	3.39	3.91	0.32	0.08	0.1	< 0.01	0.01	19.8	99.8	7.94	Coffey et al., 2021	63.3	yes
Deep lake	229.057	751.5	silt	sand	793.13	8.48219	N/A	N/A	N/A	N/A	13.2	-0.118	-10.587	3.38416	Brown 252	1
Deep lake	244.267	801.4	clay	silt	851.212	19.7719	N/A	N/A	N/A	N/A	8.6	1.183	-2.853	3.00443	Brown 252	1
Deep lake	249.326	818	clay	silt	870.534	24.0675	N/A	N/A	N/A	N/A	10.8	1.24	-6.806	2.76579	Brown 252	1	290	59.7	13	3.01	2.06	4.9	2.99	4.42	0.45	0.12	0.05	0.01	< 0.01	8.96	99.6	7.79	this study	57.26
Deep lake	253.228	830.8	clay	silt	885.427	27.4299	N/A	N/A	N/A	N/A	12.8	0.64	-6.159	1.98061	Brown 252	2
Deep lake	255.544	838.4	clay	silt	894.248	29.4356	N/A	N/A	N/A	N/A	14.5	0.762	-7.288	1.5211	Brown 252	1
Deep lake	260.375	854.25	clay	silt	912.73	33.6625	N/A	N/A	N/A	N/A	19.6219	2.699	-3.651	1.40152	Brown 252	1	1000	45.2	10.7	3.86	4.02	9.75	3.73	3.67	0.4	0.09	0.09	0.01	0.01	18.4	99.9	7.17	Coffey et al., 2021	66.4	yes
Deep lake	261.122	856.7	clay	silt	915.556	34.3111	N/A	N/A	N/A	N/A	13.4	2.645	-4.664	2.35274	Brown 252	1
Deep lake	265.328	870.5	clay	silt	931.633	38.0102	N/A	N/A	N/A	N/A	9	1.167	-5.079	2.52421	Brown 252	1
Deep lake	272.567	894.25	ash	pumice	959.146	44.1623	N/A	N/A	N/A	N/A							210	69.7	11.8	1.08	0.54	1.39	4.36	5.06	0.12	0.02	0.02	< 0.01	< 0.01	6.72	100.8	10.2	Coffey et al., 2021	68.3	yes
Deep lake	276.682	907.75	clay	silt	971.167	41.3322	N/A	N/A	N/A	N/A	17.038	-0.854	-9.511	2.84436	Brown 252	1	440	52.4	14	4.1	2.55	4.89	3.85	4.83	0.53	0.1	0.05	0.01	< 0.01	13	100.4	6.35	Coffey et al., 2021	65.3	yes
Deep lake	278.663	914.25	ash	N/A	976.958	39.9875	N/A	N/A	N/A	N/A							190	57.6	10.2	1.23	0.82	9.82	3.66	4.18	0.13	0.04	0.05	0.02	< 0.01	13.2	101	9.58	Coffey et al., 2021	60.8	yes
Deep lake	285.963	938.2	clay	silt	998.308	35.1609	N/A	N/A	N/A	N/A	11.4	-0.653	-8.301	2.76433	Brown 252	1	510	49.3	14	3.81	2.43	6.04	3.61	4.86	0.5	0.09	0.07	< 0.01	0.02	14.9	99.6	5.98	this study	55.56	no
Deep lake	289.56	950	clay	silt	1008.84	32.8765	N/A	N/A	N/A	N/A	12.3	2.405	-2.521	2.79943	Brown 252	1	1800	43.3	9.8	3.19	5.53	11.5	3.5	3.69	0.33	0.1	0.17	< 0.01	0.01	19.3	100.4	7.5	this study	50.12	no
Deep lake	305.486	1002.25	clay	silt	1055.43	24.0622	N/A	N/A	N/A	N/A	34.6884	0.164	-7.14	3.60869	Brown 252	1	550	50	13.6	4.22	3.47	6.67	3.36	4.76	0.52	0.14	0.05	0.01	0.01	13.9	100.7	6.24	Coffey et al., 2021	59.2	yes
Deep lake	307.482	1008.8	clay	silt	1061.25	23.1862	N/A	N/A	N/A	N/A	7.1	-0.515	-8.909	3.80415	Brown 252	1
Deep lake	311.81	1023	clay	silt	1073.91	21.5382	N/A	N/A	N/A	N/A	9	0.860773	-0.90947	3.35403	Stanford Deltaplus XL	1
Deep lake	317.022	1040.1	clay	N/A	1089.15	20.1222	N/A	N/A	N/A	N/A	5.3	-0.702	-9.234	3.56532	Brown 252	1	260	51.9	13	3.59	3.16	7.11	2.91	4.38	0.55	0.13	0.07	< 0.01	< 0.01	13.3	100.2	6.78	this study	57.71	no
Deep lake	319.674	1048.8	clay	N/A	1096.9	19.681	N/A	N/A	N/A	N/A	10.2	0.464	-6.875	4.06429	Brown 252	1	310	54.4	12.6	3.83	2.43	6.67	3.18	4.28	0.46	0.13	0.07	< 0.01	< 0.01	11.8	99.9	7.33	this study	56.09	no
Deep lake	320.223	1050.6	clay	N/A	1098.51	19.615	N/A	N/A	N/A	N/A	11.35	0.37	-3.7	2.9356	Brown 252	1	590	45.2	13.7	5.23	3.05	7.6	3.33	4.53	0.47	0.13	0.11	0.01	0.01	15.7	99	5.6	this study	56.89	no
Deep lake	322.478	1058	clay	silt	1105.12	19.4394	N/A	N/A	N/A	N/A	9.1	0.023	-10.915	4.20184	Brown 252	1	190	54.5	11.4	2.66	2.78	8.48	3.13	3.74	0.43	0.11	0.07	< 0.01	0.01	13.2	100.5	8.11	this study	55.35	no
Deep lake	325.709	1068.6	clay	N/A	1114.57	19.4597	N/A	N/A	N/A	N/A	12	-0.215	-5.161	4.22676	Brown 252	1	930	49.7	13.5	4.05	3.78	5.01	3.41	5.47	0.46	0.12	0.09	< 0.01	< 0.01	14.1	99.6	6.25	this study	53.93	no
Deep lake	326.822	1072.25	clay	N/A	1117.81	19.5404	N/A	N/A	N/A	N/A	13.5	4.2176	0.525775	4.2473	Stanford Deltaplus XL	1
Deep lake	330.57	1084.55	ash	pumice	1128.78	20.0838	N/A	N/A	N/A	N/A							80	72.9	11.8	0.91	0.01	0.42	2.53	5.6	0.06	< 0.01	0.03	0.01	< 0.01	5.49	99.7		Coffey et al., 2021
Deep lake	331.927	1089	clay	N/A	1132.76	20.3793	N/A	N/A	N/A	N/A	6.4	0.12	-7.121	2.83795	Brown 252	1
Deep lake	337.932	1108.7	clay	N/A	1150.79	21.5513	N/A	N/A	N/A	N/A	9	2.662	-3.493	2.77207	Brown 252	1
Deep lake	340.843	1118.25	clay	silt	1160.19	21.3468	N/A	N/A	N/A	N/A	32.28	-0.789	-4.597	2.87595	Brown 252	1	620	43.4	11	3.54	3.24	12	2.95	4.21	0.37	0.16	0.09	0.01	0.01	17.7	98.7	6.7	Coffey et al., 2021	61.6	yes
Deep lake	342.697	1124.33	clay	ash	1166.19	21.2218	N/A	N/A	N/A	N/A	7.7	-2.45173	-4.28223	3.42411	Stanford Deltaplus XL	1
Deep lake	351.434	1153	clay	silt	1194.39	20.6975	N/A	N/A	N/A	N/A	8.9	-0.819	-10.539	2.99885	Brown 252	1
Deep lake	353.416	1159.5	clay	N/A	1200.81	20.5929	N/A	N/A	N/A	N/A	7.4	-0.727839	-10.1069	2.81886	Brown 252, Stanford Deltaplus XL	2
Deep lake	355.473	1166.25	ash	pumice	1207.43	20.491	N/A	N/A	N/A	N/A							220	69.8	12.1	1.57	0.5	1.64	3.64	5.08	0.15	0.04	0.06	0.02	< 0.01	4.94	99.6	9.79	Coffey et al., 2021	55.2	yes
Deep lake	365.547	1199.3	clay	silt	1239.98	20.0816	N/A	N/A	N/A	N/A	11.3	0.074	-6.155	2.07373	Brown 252	1	410	51.8	12.2	3.8	2.92	8.13	3.32	4.05	0.51	0.16	0.08	< 0.01	0.02	13.2	100.2	7.21	this study	55.34	no
Deep lake	366.065	1201	clay	silt	1241.63	20.065	N/A	N/A	N/A	N/A	9.9	-0.313	-9.966	1.83252	Brown 252	2	200	57.8	12.4	2.93	2.36	7.31	2.92	3.7	0.55	0.16	0.07	< 0.01	< 0.01	10.1	100.3	7.91	this study	58.47	no
Deep lake	368.275	1208.25	clay	silt	1248.77	19.9978	N/A	N/A	N/A	N/A	29.9831	-0.52	-6.759	1.63274	Brown 252	1	600	47	13.4	4.74	3.25	6.75	3.74	4.81	0.52	0.17	0.08	0.01	0.01	15.8	100.3	5.95	Coffey et al., 2021	64.7	yes
Deep lake	368.473	1208.9	clay	silt	1249.41	19.9921	N/A	N/A	N/A	N/A	6.9	-0.561	-8.978	1.17939	Brown 252	1
Deep lake	368.93	1210.4	clay	silt	1250.9	19.9792	N/A	N/A	N/A	N/A	9	-0.596	-9.025	1.2073	Brown 252	1
Deep lake	380.634	1248.8	clay	N/A	1288.68	19.7657	N/A	N/A	N/A	N/A	4.7	0.243	-8.645	2.99601	Brown 252	1	410	51.4	13.2	4.58	2.69	6.08	3.83	4.05	0.51	0.12	0.06	< 0.01	< 0.01	13.2	99.8	6.61	this study	55.27	no
Deep lake	382.28	1254.2	clay	N/A	1294.01	19.7535	N/A	N/A	N/A	N/A	7	-0.008	-10.07	2.9613	Brown 252	1
Deep lake	383.642	1258.67	clay	N/A	1298.4	19.7467	N/A	N/A	N/A	N/A	5.7	-2.3391	-2.59123	2.95972	Stanford Deltaplus XL	1
Deep lake	393.314	1290.4	clay	silt	1329.63	19.786	N/A	N/A	N/A	N/A	8.9	-0.654	-8.541	2.84434	Brown 252	1
Deep lake	396.453	1300.7	clay	silt	1339.77	19.8315	N/A	N/A	N/A	N/A	7.4	-2.379	-5.912	2.15259	Brown 252	1	360	41.7	10.4	4.46	5.75	12.6	2.28	3.44	0.45	0.15	0.22	< 0.01	0.01	18.9	100.3	6.8	this study	58.18	no
Deep lake	399.212	1309.75	clay	silt	1348.68	19.8847	N/A	N/A	N/A	N/A	11.5394	0.895	-6.377	1.01378	Brown 252	1	580	45.7	13.6	4.83	3.59	6.58	4.22	4.69	0.55	0.15	0.09	< 0.01	0.02	16.8	100.8	5.7	Coffey et al., 2021	62.8	yes
Deep lake	407.289	1336.25	clay	N/A	1374.78	20.1102	N/A	N/A	N/A	N/A	7.3	1.695	-6.546	0.640328	Brown 253+	1
Deep lake	409.371	1343.08	clay	silt	1381.5	20.1848	N/A	N/A	N/A	N/A	11.5	0.939	-6.568	0.867249	Brown 253+	1
Evaporite/dessicated	411.785	1351	clay	halite	1389.28	20.2795	N/A	N/A	N/A	N/A	12	-1.41188	-5.05015	0.845411	Brown 252, Stanford Deltaplus XL	2
Evaporite/dessicated	413.995	1358.25	halite	clay	1396.42	20.3741	N/A	N/A	N/A	N/A							20	---	---	---	---	---	---	---	---	---	---	---	---	---	---		Coffey et al., 2021
Evaporite/dessicated	420.014	1378	clay	silt	1415.86	20.6682	N/A	N/A	N/A	N/A	8.4	1.493	-4.808	1.57343	Brown 252	1
Evaporite/dessicated	432.283	1418.25	clay	N/A	1455.48	21.4252	N/A	N/A	N/A	N/A	20.2254	-1.505	-5.275	1.61791	Brown 252	1	670	43	12.8	4.68	4.11	8.3	4.27	4.47	0.5	0.19	0.1	< 0.01	0.02	18.7	101.2	5.7	Coffey et al., 2021	11.9	yes
Evaporite/dessicated	435.559	1429	clay	N/A	1466.07	21.6612	N/A	N/A	N/A	N/A	7.5	-0.477	-8.603	1.51148	Brown 252	1	420	45.7	11.5	3.29	3.55	9.16	4.4	3.34	0.47	0.14	0.07	< 0.01	< 0.01	17.7	99.4	6.74	this study	51.45	no
Evaporite/dessicated	435.788	1429.75	clay	N/A	1466.82	21.6782	N/A	N/A	N/A	N/A	7.2	-0.892963	-6.99198	1.25456	Stanford Deltaplus XL	1
Evaporite/dessicated	442.6	1452.1	clay	silt	1488.81	22.2121	N/A	N/A	N/A	N/A	11.4	0.149	-5.958	2.2981	Brown 252	1
Evaporite/dessicated	448.361	1471	clay	silt	1507.41	22.7055	N/A	N/A	N/A	N/A	10.8	-0.179	-6.487	1.8205	Brown 252	1
Evaporite/dessicated	451.003	1479.67	halite	clay	1515.93	22.9437	N/A	N/A	N/A	N/A	7	1.954	-2.37	3.69086	Brown 253+	1	1500	43.5	12.8	4.2	3.6	5.71	5.95	4.14	0.44	0.13	0.09	< 0.01	0.02	19	99.6	5.77	this study	42.7	no
Evaporite/dessicated	451.714	1482	clay	N/A	1518.23	23.0091	N/A	N/A	N/A	N/A	5.2	-0.216	-5.724	3.69609	Brown 253+	1
Evaporite/dessicated	456.773	1498.6	silt	clay	1534.57	23.4894	N/A	N/A	N/A	N/A	8.3	-0.257	-12.553	3.71882	Brown 252	1	120	42.9	9.09	2.3	2.46	6.5	12.8	2.12	0.46	0.13	0.05	< 0.01	< 0.01	21.6	100.5	8.01	this study	28.02	no
Evaporite/dessicated	458.953	1505.75	clay	silt	1541.61	23.7041	N/A	N/A	N/A	N/A	19.9636	0.385	-5.847	2.86548	Brown 252	1	750	47.1	12	3.81	3.34	6.99	4.19	4.69	0.47	0.14	0.07	0.01	0.01	17.7	100.6	6.66	Coffey et al., 2021	11.3	yes
Evaporite/dessicated	459.943	1509	clay	silt	1544.8	23.8031	N/A	N/A	N/A	N/A	11.9	-0.091	-7.554	3.46894	Brown 252	1
Evaporite/dessicated	460.654	1511.33	clay	halite	1547.1	23.8747	N/A	N/A	N/A	N/A	11.4	-0.0612706	-6.27875	2.30055	Stanford Deltaplus XL	1	940	47.4	12.1	4.88	3.77	6.83	3.88	4.32	0.48	0.14	0.06	< 0.01	0.01	13.8	97.7	6.65	this study	51.2	no
Evaporite/dessicated	460.919	1512.2	clay	halite	1547.97	23.902	N/A	N/A	N/A	N/A	10	-1.236	-3.099	3.54972	Brown 252	1	1100	42.5	11.6	3.99	4.37	7.07	4.58	4.48	0.43	0.13	0.1	< 0.01	< 0.01	21.5	100.8	6.22	this study	48.37	no
Evaporite/dessicated	462.33	1516.83	clay	halite	1552.52	24.0459	N/A	N/A	N/A	N/A	9.3	2.437	-2.053	3.61036	Brown 253+	1
Evaporite/dessicated	467.563	1534	clay	silt	1569.41	24.5949	N/A	N/A	N/A	N/A	11.3	-0.522	-10.889	3.64066	Brown 253+	1	520	49.6	12.2	3.34	2.86	6.6	5.42	3.99	0.49	0.11	0.06	< 0.01	0.01	15.5	100.2	6.9	this study	47.5	no
Evaporite/dessicated	468.173	1536	clay	silt	1571.38	24.6605	N/A	N/A	N/A	N/A	5.3	-0.539	-8.038	3.31735	Brown 253+	1
Evaporite/dessicated	470.611	1544	clay	silt	1579.26	24.9259	N/A	N/A	N/A	N/A	9.5	-0.453	-4.942	2.32044	Brown 253+	1	680	42.3	11.6	3.81	3.42	11	3.9	3.84	0.5	0.18	0.07	< 0.01	0.02	19.9	100.5	6.19	this study	36.2	no
Evaporite/dessicated	471.919	1548.29	clay	silt	1583.49	25.0704	N/A	N/A	N/A	N/A	12.4	-0.492	-6.055	2.15452	Brown 253+	1	620	45.5	12.5	4.02	3.28	7.79	4.67	4.24	0.51	0.15	0.07	< 0.01	0.02	18.1	100.9	6.18	this study	48.2	no
Evaporite/dessicated	472.541	1550.33	clay	silt	1585.49	25.1393	N/A	N/A	N/A	N/A	15.2	-0.609	-8.666	2.16609	Brown 253+	1
Evaporite/dessicated	473.431	1553.25	clay	silt	1588.37	25.2387	N/A	N/A	N/A	N/A	11	0.127	-10.385	2.97576	Brown 253+	1	240	58.4	13.1	3.19	1.94	5.75	3.26	3.7	0.53	0.14	0.05	< 0.01	< 0.01	9.21	99.3	7.57	this study	58.3	no
Evaporite/dessicated	475.844	1561.17	clay	silt	1596.15	25.511	N/A	N/A	N/A	N/A	11.1	-0.431395	-8.24464	3.63395	Brown 252, Stanford Deltaplus XL	2
Evaporite/dessicated	477.622	1567	halite	clay	1601.9	25.7149	N/A	N/A	N/A	N/A	23.1	1.726	-2.653	3.44414	Brown 253+	1	1000	27.6	6.45	2.27	3.82	9.77	16.2	2.26	0.23	0.09	0.06	< 0.01	< 0.01	27	95.8	7.26	this study	18.1	no
Evaporite/dessicated	478.56	1570.08	halite	clay	1604.94	25.8235	N/A	N/A	N/A	N/A	14.7	2.006	-2.612	2.85665	Brown 253+	1
Evaporite/dessicated	481.102	1578.42	clay	silt	1613.14	26.1203	N/A	N/A	N/A	N/A	11.3	-1.542	-6.719	2.64061	Brown 253+	1	310	32.5	8.22	2.63	2.01	9.96	10.6	2.42	0.32	0.1	0.06	< 0.01	< 0.01	21.1	90	6.71	this study	23.7	no
Evaporite/dessicated	481.825	1580.79	clay	silt	1615.46	26.2053	N/A	N/A	N/A	N/A	7.2	-1.167	-8.208	2.16893	Brown 253+	1
Evaporite/dessicated	484.403	1589.25	clay	N/A	1623.8	26.5127	N/A	N/A	N/A	N/A	8	-0.625	-7.109	0.597553	Brown 253+	1
Evaporite/dessicated	485.053	1591.38	clay	N/A	1625.89	26.5908	N/A	N/A	N/A	N/A	30.7	-0.699	-7.162	0.571384	Brown 253+	1	610	45.7	13	4.49	4.15	7	4.09	4.12	0.56	0.16	0.05	< 0.01	0.01	15.2	98.5	5.97	this study	53.7	no
Evaporite/dessicated	486.589	1596.42	clay	silt	1630.87	26.7772	N/A	N/A	N/A	N/A	17.4	-0.887	-7.814	1.39197	Brown 253+	1
Evaporite/dessicated	488.213	1601.75	clay	silt	1636.1	26.9748	N/A	N/A	N/A	N/A	19.3839	-0.809	-8.331	1.96081	Brown 252	1	410	46.5	12.7	4.29	3.25	7.18	4.64	3.98	0.5	0.14	0.07	< 0.01	0.01	17.9	101.2	6.21	Coffey et al., 2021	12	yes
Evaporite/dessicated	490.515	1609.3	clay	silt	1643.53	27.2584	N/A	N/A	N/A	N/A	11.1	2.115	-4.703	2.27156	Brown 252	1	300	13.4	3.36	1.29	1.58	25	0.96	1.16	0.12	0.05	0.06	< 0.01	< 0.01	19.3	66.3	6.77	this study	54.24	no
Evaporite/dessicated	493.38	1618.7	clay	pumice	1652.8	27.6168	N/A	N/A	N/A	N/A	16	-0.886	-10.088	2.25914	Brown 252	1
Evaporite/dessicated	497.04	1630.71	silt	clay	1664.61	28.081	N/A	N/A	N/A	N/A							210	44	9	1.83	1.85	4.98	13.8	2.54	0.3	0.09	0.04	0.01	< 0.01	20.4	98.9	8.3	this study	26.12	no
Evaporite/dessicated	499.506	1638.8	clay	silt	1672.59	28.3985	N/A	N/A	N/A	N/A	11.8	-0.54	-10.358	2.86092	Brown 252	1
Evaporite/dessicated	509.016	1670	clay	silt	1703.3	29.6517	N/A	N/A	N/A	N/A	10.2	-0.397	-8.193	3.38561	Brown 252	1
Evaporite/dessicated	520.172	1706.6	clay	N/A	1739.31	31.1764	N/A	N/A	N/A	N/A	11.1	-1.803	-4.41	3.08864	Brown 252	1	1000	43.5	12.8	4.35	5.07	7.18	4.23	4.01	0.47	0.12	0.12	< 0.01	< 0.01	18.4	100.2	5.77	this study	53.11	no
Evaporite/dessicated	521.132	1709.75	clay	N/A	1742.41	31.3102	N/A	N/A	N/A	N/A	18.1371	2.401	-2.867	2.71262	Brown 252	1	1100	46.9	11.7	3.84	3.74	6.65	4.86	3.82	0.46	0.1	0.07	0.01	0.02	18.6	100.8	6.8	Coffey et al., 2021	12.7	yes
Evaporite/dessicated	525.603	1724.42	clay	silt	1756.85	31.9381	N/A	N/A	N/A	N/A	6.9	0.698	-8.346	2.52606	Brown 253+	1
Evaporite/dessicated	530.657	1741	clay	N/A	1773.19	32.6583	N/A	N/A	N/A	N/A	7.5	1.66197	-3.03618	5.12719	Brown 252, Stanford Deltaplus XL	2
Evaporite/dessicated	533.476	1750.25	halite	clay	1782.29	33.0637	N/A	N/A	N/A	N/A							40	1.77	0.43	0.11	0.34	< 0.01	49	0.15	0.02	< 0.01	< 0.01	< 0.01	< 0.01	49.1	100.8		Coffey et al., 2021
Deep lake	536.448	1760	clay	N/A	1791.88	33.4936	N/A	N/A	N/A	N/A	2.9	-1.10986	-7.40531	5.14279	Stanford Deltaplus XL	1
Deep lake	543.306	1782.5	clay	N/A	1814.04	34.4978	N/A	N/A	N/A	N/A	4.8	-1.043	4.612	4.46118	Brown 252	1	560	20.1	5.77	2.26	11.7	20	3.23	1.72	0.2	0.13	0.07	< 0.01	< 0.01	36	101.2	5.91	this study	44.57	no
Deep lake	550.545	1806.25	clay	silt	1837.42	35.5733	N/A	N/A	N/A	N/A	15.0733	-0.754	-4.673	4.68872	Brown 252	1	780	44.9	11	3.58	3.34	8.63	4.66	3.54	0.39	0.12	0.07	0.01	< 0.01	19.4	99.7	6.93	Coffey et al., 2021	11.8	yes
Deep lake	551.261	1808.6	clay	silt	1839.71	35.6796	N/A	N/A	N/A	N/A	2.5	1.466	-2.502	3.67116	Brown 252	1	1100	39.9	10.1	3.31	4.74	12.4	3.32	3.18	0.37	0.13	0.09	< 0.01	0.02	20.2	97.7	6.7	this study	53.15	no
Deep lake	554.431	1819	clay	N/A	1849.95	36.1558	N/A	N/A	N/A	N/A	2.7	1.94447	0.783728	2.6325	Stanford Deltaplus XL	1
Deep lake	560.984	1840.5	clay	N/A	1871.1	37.1482	N/A	N/A	N/A	N/A	3.9	0.507	-2.891	4.95278	Brown 252	1	910	24.7	5.76	1.8	4.13	25.5	3.17	1.84	0.19	0.18	0.05	< 0.01	< 0.01	28.8	96.1	7.28	this study	44.42	no
Deep lake	566.623	1859	clay	N/A	1889.31	38.0112	N/A	N/A	N/A	N/A	6.3	3.299	1.594	5.27265	Brown 252	1	600	35.9	7.57	1.89	2.53	19.8	3.43	2.36	0.21	0.07	0.06	< 0.01	< 0.01	22.8	96.6	8.05	this study	48.01	no
Deep lake	569.976	1870	clay	silt	1900.17	38.5288	N/A	N/A	N/A	N/A	9.4	-0.143	-10.917	4.66226	Brown 252	1	270	51.4	11.6	4.3	1.99	4.99	5.51	3.38	0.49	0.11	0.05	< 0.01	< 0.01	13.4	97.2	7.52	this study	47.69	no
Deep lake	578.663	1898.5	clay	silt	1928.2	39.8773	N/A	N/A	N/A	N/A	15	-1.842	-6.917	4.59519	Brown 252	1	530	50.6	12.5	3.26	2.76	7.62	3.96	4.3	0.44	0.12	0.06	< 0.01	0.02	14.5	100.1	6.87	this study	52.81	no
Deep lake	581.467	1907.7	clay	silt	1937.27	40.3171	N/A	N/A	N/A	N/A	11.7	-1.649	-3.978	3.0071	Brown 252	1	460	21.8	5.84	1.92	2.38	21.1	2.15	1.79	0.2	0.08	0.05	< 0.01	0.01	21.3	78.6	6.34	this study	51.62	no
Deep lake	585.551	1921.1	clay	silt	1950.45	40.9584	N/A	N/A	N/A	N/A	4	-0.76	-6.324	1.7829	Brown 252	1
Deep lake	586.51	1924.25	clay	N/A	1953.55	41.1097	N/A	N/A	N/A	N/A	17.1829	0.786	-3.286	1.71934	Brown 252	1	1200	43.3	10.1	3.02	4.05	9.68	4.58	3.46	0.37	0.1	0.07	< 0.01	0.01	21.6	100.3	7.28	Coffey et al., 2021	13.9	yes
Deep lake	588.02	1929.2	clay	N/A	1958.42	41.3481	N/A	N/A	N/A	N/A	12.4	1.91	-3.072	2.39027	Brown 252	1	1100	42.4	10.9	3.42	4.02	11.5	4.17	3.37	0.38	0.09	0.08	< 0.01	0.01	20.1	100.5	6.6	this study	50.92	no
Deep lake	588.34	1930.25	clay	N/A	1959.46	41.3987	N/A	N/A	N/A	N/A	12.5	1.91439	-1.62235	2.5885	Stanford Deltaplus XL	1
Deep lake	590.78	1938.25	pumice	ash	1967.34	41.7849	N/A	N/A	N/A	N/A							240	66	11.3	1.27	1.03	2.24	5.79	4.17	0.12	0.03	0.04	0.01	< 0.01	8.42	100.4	9.91	Coffey et al., 2021	5.7	yes
Deep lake	591.617	1941	clay	N/A	1970.05	41.9181	N/A	N/A	N/A	N/A	12.4	0.466	-7.305	2.63888	Brown 252	1
Deep lake	596.951	1958.5	clay	N/A	1987.26	42.766	N/A	N/A	N/A	N/A	9.4	1.239	-0.483	2.66003	Brown 252	1	560	49.4	10.8	2.13	3.61	7.21	3.42	3.7	0.23	0.07	0.1	< 0.01	< 0.01	15	95.7	7.76	this study	52.86	no
Deep lake	597.85	1961.45	pumice	N/A	1990.17	42.9097	N/A	N/A	N/A	N/A							100	69.3	11.5	1.14	0.19	1.15	6.12	4.42	0.07	0.01	0.05	0.02	< 0.01	7.18	101.1	10.23	Coffey et al., 2021	5.2	yes
Deep lake	606.491	1989.8	clay	N/A	2018.07	44.2949	N/A	N/A	N/A	N/A	6.2	1.329	-4.281	2.57867	Brown 252	1	710	49.4	12.1	3.75	3.09	6.43	4	5.6	0.37	0.09	0.06	0.01	< 0.01	13.2	98.1	6.93	this study	48.9	no
Deep lake	610.895	2004.25	clay	N/A	2032.31	45.0063	N/A	N/A	N/A	N/A	17.2638	1.782	-4.248	2.20363	Brown 252	1	1100	45.3	12.9	4.31	3.51	6.23	4.08	6.14	0.46	0.1	0.08	< 0.01	0.01	16.1	99.2	5.96	Coffey et al., 2021	10.7	yes
Deep lake	619.049	2031	clay	silt	2058.63	46.3278	N/A	N/A	N/A	N/A	12.1	2.105	-6.064	1.23429	Brown 252	1	440	52.8	12.3	3.68	2.2	7.56	3.48	5.66	0.4	0.11	0.07	< 0.01	< 0.01	10.3	98.6	7.29	this study	50.93	no
Deep lake	627.812	2059.75	ash	N/A	2086.92	47.7576	N/A	N/A	N/A	N/A							260	68.2	11.1	1.68	0.12	0.59	5.93	4.5	0.12	0.01	0.04	< 0.01	< 0.01	7.07	99.4	n/a	Coffey et al., 2021	n/a	n/a
Deep lake	636.514	2088.3	clay	N/A	2110.01	45.6752	N/A	N/A	N/A	N/A	11.9	1.142	-5.659	1.2762	Brown 252	1
Deep lake	641.985	2106.25	clay	silt	2124.5	45.1112	N/A	N/A	N/A	N/A	11.9838	2.283	-2.984	1.34145	Brown 252	1	980	45.6	13.4	4.31	3.11	6.41	3.85	6.99	0.5	0.1	0.08	< 0.01	0.02	15.9	100.2	5.78	Coffey et al., 2021	10.2	yes
Deep lake	657.047	2155.67	clay	N/A	2164.34	46.8243	N/A	N/A	N/A	N/A	14.7	1.93019	-3.87593	1.42966	Stanford Deltaplus XL	1
Deep lake	664.525	2180.2	clay	N/A	2184.11	49.3241	N/A	N/A	N/A	N/A	13	0.058	-5.648	1.37211	Brown 252	1	510	47.1	14.7	4.43	2.85	7.02	2.66	6.69	0.55	0.26	0.11	< 0.01	0.02	14	100.4	5.44	this study	55.86	no
Deep lake	667.756	2190.8	clay	N/A	2192.68	50.7008	N/A	N/A	N/A	N/A	7.6	0.954	-6.42	1.00278	Brown 252	1
Deep lake	671.855	2204.25	clay	sand	2203.52	52.6672	N/A	N/A	N/A	N/A	11.8859	2.386	-4.502	0.842277	Brown 252	1	1100	47.3	12.2	4.34	3.47	6.38	3.54	7.34	0.51	0.11	0.09	< 0.01	< 0.01	15.4	100.7	6.58	Coffey et al., 2021	9.1	yes
Deep lake	672.236	2205.5	clay	sand	2204.53	52.8613	N/A	N/A	N/A	N/A	12.7	2.11	-4.711	0.801467	Brown 252	1
Deep lake	683.362	2242	clay	sand	2233.95	59.3035	N/A	N/A	N/A	N/A	9.1	3.178	-4.547	0.346078	Brown 252	1	1300	44	12.6	4.19	4.64	7.62	3.53	6.76	0.47	0.08	0.09	0.02	0.02	16.5	100.5	5.93	this study	48.98	no
Deep lake	687.781	2256.5	clay	N/A	2245.64	62.212	N/A	N/A	N/A	N/A	14.1	2.079	-4.869	0.304434	Brown 252	1
Deep lake	694.792	2279.5	clay	N/A	2264.18	67.1423	N/A	N/A	N/A	N/A	9.6	1.87299	-5.35926	0.592604	Stanford Deltaplus XL	1
Deep lake	698.205	2290.7	clay	N/A	2273.23	69.668	N/A	N/A	N/A	N/A	2.4	2.171	-4.928	1.0044	Brown 252	1
Deep lake	702.335	2304.25	clay	N/A	2284.16	72.8077	N/A	N/A	N/A	N/A	9.53985	2.634	-3.767	0.990747	Brown 252	1	840	44.6	12.1	3.87	3.93	8.84	3.17	7.06	0.49	0.09	0.08	< 0.01	0.01	16.7	100.9	6.26	Coffey et al., 2021	8.9	yes
Deep lake	710.489	2331	clay	N/A	2305.72	79.2476	N/A	N/A	N/A	N/A	12.2	2.946	-2.907	0.856399	Brown 253+	1
Deep lake	712.805	2338.6	clay	N/A	2311.86	81.1316	N/A	N/A	N/A	N/A	12.3	2.197	-4.754	1.4716	Brown 252	1	610	48.7	11.9	3.57	2.98	7.75	2.97	7.75	0.47	0.11	0.09	0.01	< 0.01	14.2	100.5	6.95	this study	47.27	no
Deep lake	718.49	2357.25	clay	N/A	2326.88	85.825	N/A	N/A	N/A	N/A	10.1	1.826	-4.699	1.56156	Brown 253+	1
Deep lake	719.176	2359.5	clay	N/A	2328.71	86.4022	N/A	N/A	N/A	N/A	9.4	2.216	-1.211	1.5228	Brown 252	1	840	44	14.8	5.13	4.33	6.53	2.49	6.96	0.55	0.31	0.12	< 0.01	0.02	14.5	99.8	5.05	this study	56	no
Deep lake	723.443	2373.5	clay	N/A	2339.98	89.9973	N/A	N/A	N/A	N/A	10.5	2.094	-4.622	1.45342	Brown 252	1	1000	46.7	12.1	4.09	3.79	7.37	3.15	7.27	0.47	0.11	0.11	< 0.01	0.02	14.6	99.7	6.55	this study	48.11	no
Deep lake	732.815	2404.25	clay	N/A	2364.79	98.0777	N/A	N/A	N/A	N/A	8.49932	3.082	-3.344	3.44605	Brown 252	1	1300	43.8	12	4.08	4.81	7.51	3.18	6.77	0.45	0.1	0.08	0.02	0.01	17.3	100.1	6.19	Coffey et al., 2021	10.2	yes
Deep lake	743.499	2439.3	clay	N/A	2393.05	107.499	N/A	N/A	N/A	N/A	9.1	2.871	-4.254	3.57908	Brown 252	1	1400	47.7	13.7	4.36	3.72	5.44	3.33	7.34	0.5	0.08	0.08	< 0.01	< 0.01	12.6	98.9	5.91	this study	50.51	no
Deep lake	750.875	2463.5	clay	N/A	2412.54	114.109	N/A	N/A	N/A	N/A	13.9	5.368	3.764	3.51291	Brown 253+	1
Deep lake	750.899	2463.58	clay	N/A	2412.62	114.136	N/A	N/A	N/A	N/A	10.95	3.75862	0.229904	3.5061	Brown 252, Stanford Deltaplus XL	2	810	51.4	15	3.85	3.35	3.62	3.08	7.36	0.59	0.13	0.04	< 0.01	0.01	10.8	99.2	5.82	this study	53.5	no
Deep lake	752.908	2470.17	clay	N/A	2417.94	115.952	N/A	N/A	N/A	N/A	8.7	2.398	-4.292	2.92698	Brown 253+	1	660	31.2	4.07	0.87	1.2	1.68	26.6	1.68	0.11	0.02	0.03	< 0.01	< 0.01	21.2	88.6	13.01	this study	8.2	no
Deep lake	754.508	2475.42	clay	N/A	2422.17	117.401	N/A	N/A	N/A	N/A	7.1	4.021	1.005	2.52591	Brown 253+	1
Deep lake	754.977	2476.96	clay	N/A	2423.42	117.827	N/A	N/A	N/A	N/A	6.9	4.401	-0.805	2.39311	Brown 253+	1	2000	38.1	9.11	2.99	7.08	11.5	3.21	5.13	0.33	0.07	0.11	< 0.01	0.02	22.2	99.8	7.1	this study	27.1	no
Deep lake	756.946	2483.42	clay	ash	2428.63	119.617	N/A	N/A	N/A	N/A	4.5	2.974	-4.343	2.19695	Brown 253+	1
Deep lake	757.175	2484.17	clay	N/A	2429.24	119.826	N/A	N/A	N/A	N/A	4.8	3.634	-3.592	2.18621	Brown 253+	1	2000	45.7	12	3.59	4.8	6.21	3.36	7.29	0.39	0.09	0.07	< 0.01	0.01	16	99.5	6.46	this study	38	no
Deep lake	757.504	2485.25	clay	N/A	2430.08	120.117	N/A	N/A	N/A	N/A	6.1	3.547	-2.955	2.20616	Brown 253+	1
Deep lake	758.748	2489.33	clay	ash	2433.39	121.256	N/A	N/A	N/A	N/A	14	2.093	-6.832	2.27191	Brown 253+	1	730	49.2	14.4	3.4	1.74	3.93	5.15	9.17	0.37	0.06	0.06	< 0.01	< 0.01	12.7	100.1	5.8	this study	43.9	no
Deep lake	759.738	2492.58	clay	N/A	2436.01	122.158	N/A	N/A	N/A	N/A	19.1	4.142	-0.749	2.32351	Brown 253+	1
Deep lake	761.11	2497.08	clay	N/A	2439.63	123.41	N/A	N/A	N/A	N/A	7.3	2.388	-4.986	2.38853	Brown 253+	1
Deep lake	761.467	2498.25	clay	N/A	2440.58	123.739	N/A	N/A	N/A	N/A	9.4	2.188	-5.007	2.10573	Brown 253+	1
Deep lake	764.438	2508	clay	N/A	2448.44	126.459	N/A	N/A	N/A	N/A	13.1	2.364	-6.293	0.608424	Brown 252	1	920	51.1	11.5	3.04	3.77	6.88	3.12	7.31	0.47	0.1	0.07	< 0.01	0.01	12	99.3	7.54	this study	46.9	no
Deep lake	764.515	2508.25	clay	N/A	2448.63	126.523	N/A	N/A	N/A	N/A	17.8574	2.652	-4.759	0.583335	Brown 252	1	1000	44.9	12.9	4.34	4.46	8.07	3.06	6.32	0.53	0.1	0.07	0.01	0.02	16.3	101.1	5.91	Coffey et al., 2021	9.8	yes
Deep lake	771.144	2530	clay	silt	2466.17	132.626	N/A	N/A	N/A	N/A	9	2.274	-5.474	1.20937	Brown 252	1
Deep lake	775.106	2543	clay	N/A	2480.91	135.824	2476.67	136.299	2478.79	137.291	19	1.116	-5.45	1.35939	Brown 252	1	570	49.6	16.4	3.41	2.2	4.69	2.47	9.98	0.49	0.13	0.09	< 0.01	0.02	10.2	99.7	5.13	this study	52.45	no
Deep lake	775.868	2545.5	clay	N/A	2493.32	135.369	2478.68	137.003	2486	137.988	9.5	0.651	-7.913	1.10541	Brown 253+	1
Deep lake	778.977	2555.7	clay	silt	2544.11	133.535	2486.91	139.89	2515.51	140.842	6.8	0.791	-7.336	0.912562	Brown 252	1	430	47.4	12.8	4.77	2.66	8.19	2.01	7.16	0.5	0.23	0.09	< 0.01	0.02	13.2	99	6.28	this study	40.9	no
Deep lake	779.169	2556.33	clay	silt	2547.22	133.425	2487.41	140.067	2517.31	141.016	15.3	1.077	-6.761	0.947592	Brown 253+	1
Deep lake	781.05	2562.5	clay	silt	2577.92	132.345	2492.38	141.816	2535.15	142.746	14.4	1.27	-6.853	3.17798	Brown 253+	1
Deep lake	782.726	2568	clay	silt	2605.36	131.397	2496.83	143.381	2551.09	144.294	10	0.61	-9.0685	3.13525	Brown 252	2	640	51.2	12.7	3.92	2.21	6.41	3.74	6.7	0.55	0.12	0.08	< 0.01	0.02	12.3	100	6.84	this study	46.5	no
Deep lake	784.415	2573.54	clay	silt	2632.79	130.465	2501.27	144.947	2567.03	145.845	15	3.632	-0.706	3.22188	Brown 253+	1
Deep lake	787.795	2584.63	clay	silt	2688.16	128.637	2510.24	148.115	2599.2	148.981	12.9	1.593	-4.909	3.38745	Brown 253+	1
Deep lake	792.367	2599.63	clay	silt	2762.79	126.287	2522.33	152.395	2642.56	153.221	9.1	1.233	-7.541	3.0667	Brown 253+	1
Deep lake	793.306	2602.71	clay	silt	2778.14	125.82	2524.82	153.277	2651.48	154.095	11.8	0.824	-8.232	1.43646	Brown 253+	1
Deep lake	793.836	2604.45	clay	silt	2786.8	125.56	2526.22	153.774	2656.51	154.589	11.1584	2.344	-7.224	0.571025	Brown 252	1	1200	47.8	14.3	4.95	3.33	5.76	3.31	7.46	0.56	0.09	0.09	0.01	0.01	13	100.7	5.67	Coffey et al., 2021	9	yes
Deep lake	795.528	2610	clay	silt	2814.4	124.742	2530.69	155.361	2672.55	156.162	11.6	0.595	-8.565	1.13103	Brown 252	2
Deep lake	796.266	2612.42	clay	silt	2826.49	124.39	2532.65	156.057	2679.57	156.852	10.5	1.355	-7.446	1.48185	Brown 253+	1
Deep lake	799.743	2623.83	clay	silt	2883.16	122.79	2541.83	159.322	2712.49	160.091	12.3	1.122	-5.663	1.46302	Brown 253+	1
Deep lake	801.624	2630	clay	silt	2913.86	121.959	2546.8	161.093	2730.33	161.848	9.4	1.291	-4.863	1.08668	Brown 252	1	810	46.7	15.4	5.27	3.05	5.43	3.02	7.54	0.61	0.1	0.11	0.01	< 0.01	12.7	99.9	5.15	this study	53.98	no
Deep lake	804.648	2639.92	clay	silt	2963.34	120.674	2554.82	163.951	2759.08	164.686	10.2	0.719	-6.89	0.9505	Brown 253+	1
Deep lake	805.422	2642.46	clay	silt	2975.92	120.359	2556.85	164.678	2766.39	165.408	18.4	0.803	-7.079	0.952329	Brown 252	1
Deep lake	808.253	2651.75	clay	silt	3022.14	119.238	2564.34	167.353	2793.24	168.064	7.9	1.554	-5.507	2.21001	Brown 252	1
Deep lake	808.33	2652	clay	silt	3023.44	119.207	2564.55	167.428	2794	168.139	8.8	1.15314	-5.64081	2.27537	Brown 252, Stanford Deltaplus XL	2
Deep lake	810.311	2658.5	clay	silt	3055.78	118.462	2569.79	169.301	2812.79	170	9.8	-0.879109	-10.9583	2.4411	Stanford Deltaplus XL	1
Deep lake	811.554	2662.58	clay	silt	3076.03	118.011	2573.07	170.475	2824.55	171.166	10.8	1.332	-6.018	2.62786	Brown 253+	1
Deep lake	813.755	2669.8	clay	silt	3112.12	117.238	2578.92	172.569	2845.52	173.247	7.5	0.644	-9.008	3.15695	Brown 252	1	650	51	14.3	4.59	2.3	5.96	2.42	8.06	0.56	0.12	0.1	< 0.01	0.01	10.9	100.2	6.05	this study	52.95	no
Deep lake	814.858	2673.42	clay	silt	3130.09	116.868	2581.83	173.612	2855.96	174.283	8.9	2.675	-4.672	3.29827	Brown 253+	1
Deep lake	815.898	2676.83	clay	silt	3147.07	116.528	2584.58	174.598	2865.83	175.264	7.4	3.266	-3.255	3.25063	Brown 253+	1
Deep lake	820.522	2692	clay	silt	3222.53	115.127	2596.8	178.984	2909.66	179.626	22.4	4.195	-0.096	2.11616	Brown 253+	1
Deep lake	822.655	2699	clay	silt	3257.47	114.541	2602.46	181.018	2929.97	181.65	8.2	1.873	-5.496	2.27568	Brown 252	1	720	52.9	12.1	3.48	3.72	7.29	2.35	6.22	0.53	0.13	0.07	0.01	0.03	11.5	100.3	7.42	this study	53.31	no
Deep lake	823.29	2701.08	clay	silt	3267.76	114.376	2604.13	181.617	2935.95	182.246	8.5	1.96057	-4.49433	2.696	Stanford Deltaplus XL	1
Deep lake	823.798	2702.75	clay	silt	3276.09	114.245	2605.48	182.103	2940.78	182.729	9.7	3.73708	-1.0422	2.00815	Stanford Deltaplus XL	1
Deep lake	824.255	2704.25	clay	silt	3283.61	114.128	2606.69	182.54	2945.15	183.164						1	1000	36.7	8.6	2.9	11.9	10.7	2.2	3.94	0.39	0.06	0.06	< 0.01	< 0.01	23.4	100.9	7.24	Coffey et al., 2021	n/a	n/a
Deep lake	828.446	2718	clay	silt	3352.03	113.158	2617.78	186.529	2984.91	187.135	7.1	1.703	-6.047	2.49901	Brown 252	1	660	52.5	14.2	4.5	2.58	4.84	2.21	8.95	0.6	0.12	0.09	0.02	0.02	8.93	99.6	6.27	this study	51.59	no
Deep lake	830.135	2723.54	clay	silt	3379.47	112.814	2622.22	188.13	3000.85	188.729	8.7	1.858	-5.367	3.38787	Brown 253+	1
Deep lake	832.409	2731	clay	silt	3416.71	112.389	2628.25	190.305	3022.48	190.894	13.1	4.182	-0.682	3.37094	Brown 253+	1	1200	47.8	11.5	3.79	7.49	5.44	2.42	6.04	0.5	0.1	0.1	< 0.01	< 0.01	15	100.1	7.05	this study	52.2	no
Deep lake	836.182	2743.38	clay	silt	3478.28	111.793	2638.23	193.903	3058.25	194.478	16.5	0.343	-8.537	3.749	Brown 253+	1	530	48.2	13.7	4.36	2.15	8.85	2	7.24	0.58	0.12	0.1	< 0.01	0.02	13.1	100.4	5.97	this study	55.2	no
Deep lake	837.947	2749.17	clay	silt	3507.18	111.56	2642.91	195.593	3075.05	196.163	51.4	1.364	-9.207	3.68334	Brown 253+	1
Deep lake	838.581	2751.25	clay	silt	3517.47	111.484	2644.58	196.195	3081.02	196.763	13.4	0.468	-9.621	0.926569	Brown 253+	1
Deep lake	840.486	2757.5	clay	silt	3548.67	111.277	2649.63	198.021	3099.15	198.582	9.2	2.061	-7.522	0.9658	Brown 253+	1	1400	46.6	10.4	3.49	5.81	9.92	2.45	5.37	0.44	0.1	0.09	< 0.01	0.01	16.2	100.9	7.6	this study	36.3	no
Deep lake	844.092	2769.33	clay	silt	3607.46	110.983	2659.15	201.465	3133.31	202.015	11	1.008	-9.792	0.984058	Brown 253+	1
Deep lake	846.811	2778.25	clay	silt	3651.88	110.844	2666.35	204.068	3159.12	204.611	8.9	1.439	-9.8205	1.10714	Brown 253+	1
Deep lake	849.807	2788.08	clay	silt	3700.88	110.775	2674.29	206.942	3187.58	207.477	34.1	1.611	-9.613	0.611335	Brown 253+	1
Deep lake	853.111	2798.92	clay	silt	3754.77	110.8	2683.02	210.106	3218.89	210.632	16.8	0.438	-10.399	0.686418	Brown 253+	1	310	41.6	9.78	2.98	1.67	17.9	1.6	5.58	0.39	0.09	0.3	< 0.01	0.01	17.8	99.7	7.22	this study	29	no
Deep lake	856.183	2809	clay	silt	3804.91	110.919	2691.14	213.051	3248.02	213.571	12.2	1.033	-8.705	0.932593	Brown 252	1	940	55.7	12.8	3.73	4.3	5.25	2.41	5.85	0.53	0.14	0.08	< 0.01	< 0.01	9.23	100	7.38	this study	55.42	no
Deep lake	857.073	2811.92	clay	silt	3819.44	110.971	2693.49	213.905	3256.47	214.423	6	0.652	-8.917	0.964495	Brown 253+	1	760	54.5	12.6	3.61	3.49	5.12	3.79	4.87	0.48	0.12	0.06	< 0.01	0.01	11	99.7	7.34	this study	46.6	no
Deep lake	858.85	2817.75	clay	silt	3848.51	111.097	2698.2	215.613	3273.36	216.128	4.8	-0.433	-10.876	0.933258	Brown 253+	1
Deep lake	860.322	2822.58	clay	silt	3872.52	111.225	2702.09	217.025	3287.3	217.537	5.6	0.193	-10.292	1.13923	Brown 253+	1	460	55.2	13	4.03	1.9	5.44	2.26	7.38	0.53	0.12	0.06	< 0.01	0.01	9.3	99.3	7.21	this study	45.4	no
Deep lake	861.618	2826.83	clay	silt	3893.75	111.355	2705.53	218.274	3299.64	218.783	12.4	0.844	-10.142	1.10235	Brown 253+	1
Deep lake	862.584	2830	clay	silt	3909.43	111.461	2708.07	219.196	3308.75	219.704	12.8	0.705	-8.068	0.988089	Brown 253+	1	400	52.7	14.1	3.83	1.92	7.05	2.23	7.08	0.54	0.11	0.1	< 0.01	0.01	10.2	99.9	6.34	this study	55.4	no
Deep lake	865.784	2840.5	clay	silt	3961.69	111.88	2716.53	222.272	3339.11	222.775	8.9	1.353	-10.512	0.960859	Brown 252	1
Deep lake	865.976	2841.13	clay	silt	3964.96	111.909	2717.06	222.464	3341.01	222.967	13.1	1.825	-10.028	1.29064	Brown 253+	1	320	38.5	9.42	2.5	1.29	20.7	2.04	3.71	0.36	0.09	0.17	< 0.01	< 0.01	21.2	99.9	6.94	this study	23	no
Deep lake	867.257	2845.33	clay	silt	3985.86	112.106	2720.45	223.695	3353.15	224.196	35.2	1.5055	-10	0.819604	Brown 253+	1
Deep lake	868.363	2848.96	clay	silt	4003.83	112.288	2723.36	224.753	3363.59	225.252	24.4	-0.244	-11.642	0.865748	Brown 253+	1
Deep lake	869.229	2851.8	clay	silt	4018.03	112.44	2725.66	225.59	3371.85	226.088	7.5	-0.513	-11.622	0.810358	Brown 252	1
Deep lake	871.246	2858.42	clay	silt	4051.02	112.82	2731	227.533	3391.01	228.029	4.7	0.984	-11.516	0.594281	Brown 253+	1
Deep lake	871.448	2859.08	clay	silt	4054.29	112.859	2731.53	227.726	3392.91	228.221	43.2	1.065	-10.251	1.41652	Brown 253+	1	290	55.5	13.1	3.43	1.58	5.69	3.75	5	0.52	0.14	0.09	< 0.01	< 0.01	10.8	99.6	7.19	this study	53.1	no
Deep lake	874.752	2869.92	clay	silt	4108.18	113.566	2740.26	230.903	3424.22	231.394	9	0.418	-11.508	1.4948	Brown 253+	1
Deep lake	875.221	2871.46	clay	silt	4115.86	113.675	2741.51	231.355	3428.68	231.846	9.2	-0.905	-14.131	1.53339	Brown 253+	1	220	57.7	13.6	4.12	1.52	5.95	2.3	5.66	0.66	0.14	0.16	< 0.01	0.01	7.52	99.4	7.2	this study	55.2	no
Deep lake	877.519	2879	clay	silt	4153.42	114.236	2747.59	233.571	3450.51	234.059	5.5	-0.355	-10.76	1.27144	Brown 253+	1	260	58.4	13.9	3.77	1.51	5.22	2.31	6.17	0.61	0.17	0.09	< 0.01	0.02	7.05	99.2	7.34	this study	52.6	no
Deep lake	877.635	2879.38	clay	silt	4155.38	114.267	2747.91	233.686	3451.65	234.175	4.5	0.5395	-12.442	1.26786	Brown 253+	1	230	59.7	13.8	3.84	1.47	4.4	3.06	4.92	0.62	0.14	0.06	< 0.01	0.01	7.29	99.3	52.6	this study	48.1	no
Deep lake	878.281	2881.5	clay	silt	4165.83	114.432	2749.6	234.303	3457.72	234.791	22.45	-0.119	-11.798	0.883221	Brown 253+	2
Deep lake	880.567	2889	clay	silt	4203.23	115.053	2755.66	236.51	3479.45	236.996	8.8	-1.106	-11.539	0.827363	Brown 253+	1	330	55.9	13.8	4.36	1.92	5.42	2.81	5.54	0.61	0.14	0.11	0.01	0.02	8.82	99.5	6.87	this study	55.3	no
Deep lake	881.253	2891.25	clay	silt	4214.34	115.246	2757.46	237.165	3485.9	237.651	5	-0.185	-10.185	0.612315	Brown 253+	1
Deep lake	883.487	2898.58	clay	silt	4250.92	115.91	2763.39	239.325	3507.15	239.809	21	1.5155	-11.247	0.557387	Brown 253+	1	250	54.2	13.1	3.93	1.64	7.87	2.56	5.42	0.6	0.16	0.11	< 0.01	0.01	9.8	99.4	7.02	this study	56.5	no
Deep lake	884.2	2900.92	clay	silt	4262.52	116.13	2765.26	240.01	3513.89	240.493	25.9	1.22	-11.1545	0.891246	Brown 253+	1	210	51.4	12.6	3.8	1.38	10.4	1.99	5.13	0.59	0.13	0.12	< 0.01	0.02	11.3	98.9	6.92	this study	58.8	no
Deep lake	884.469	2901.8	clay	silt	4266.93	116.215	2765.98	240.27	3516.45	240.753	10.7	1.582	-11.554	0.605409	Brown 252	1
Deep lake	885.724	2905.92	clay	silt	4287.34	116.615	2769.28	241.476	3528.31	241.958	8.8	0.996	-12.672	0.560027	Brown 253+	1
Deep lake	887.45	2911.58	clay	silt	4315.59	117.189	2773.86	243.144	3544.73	243.626	30.8	1.104	-11.743	1.09892	Brown 253+	1	170	31.9	7.64	2.26	1.06	27.6	1.91	2.79	0.36	0.11	0.1	< 0.01	< 0.01	24.2	99.9	7.09	this study	23.6	no
Deep lake	888.37	2914.6	clay	silt	4330.62	117.505	2776.3	244.032	3553.46	244.513	11.6	1.559	-11.662	1.02236	Brown 252	1	260	61.1	14.4	4.31	1.84	3.11	3.14	5.15	0.77	0.17	0.05	< 0.01	< 0.01	5.08	99.1	7.2	this study	57.28	no
Deep lake	889.812	2919.33	clay	silt	4354.14	118.013	2780.1	245.422	3567.12	245.902	6.4	-0.848	-14.149	1.02287	Brown 253+	1
Deep lake	890.373	2921.17	clay	silt	4363.28	118.216	2781.59	245.962	3572.43	246.442	23.1	0.82	-12.109	1.00273	Brown 253+	1
Deep lake	892.506	2928.17	clay	silt	4398.23	119.011	2787.25	248.028	3592.74	248.507	17.3	1.618	-12.684	0.894802	Brown 253+	1	160	42.8	10.1	3.22	1.35	18.3	1.93	3.94	0.51	0.12	0.14	< 0.01	< 0.01	17.5	99.9	7.19		30.7	no
Deep lake	893.399	2931.1	clay	silt	4412.77	119.353	2789.6	248.887	3601.18	249.367	15.8	1.915	-11.862	0.353525	Brown 252	1	210	43.9	9.5	3.36	1.47	18.3	1.79	3.78	0.48	0.13	0.11	0.01	0.01	18.1	100.9	7.84	this study	57.45	no
Deep lake	894.536	2934.83	clay	silt	4431.38	119.799	2792.62	249.988	3612	250.467	3.9	-0.847	-12.457		Brown 253+	1	280	58.4	15.3	5.13	1.98	2.72	2.15	7.4	0.7	0.19	0.04	< 0.01	0.01	5.27	99.3	6.48	this study	55.9	no
Shallow Dessicated	896.316	2940.67	silt	sand	4460.45	120.517	2797.33	251.708	3628.89	252.186	38.1	1.551	-11.92		Brown 253+	1
Lithic Tuff	992.048	3254.75	ash	pumice	6023.87	184.102	3050.58	344.59	4537.22	345.124							290	61.7	15.4	3.58	1.2	1.83	3.27	8.04	0.52	0.15	0.03	0.01	0.01	4.39	100.1	6.8	Coffey et al., 2021	n/a	n/a
Lithic Tuff	997.382	3272.25	ash	pumice	6110.92	188.56	3064.68	349.779	4587.8	350.318							170	60.4	12.6	1.57	0.38	3.73	3.89	6.7	0.28	0.04	0.12	< 0.01	< 0.01	10.7	100.5	8.14	Coffey et al., 2021	n/a	n/a
